# Supplementary material for: Regeneration of hyaline-like cartilage in situ with SOX9 stimulation of bone marrow-derived mesenchymal stem cells
Source: PubMed Central journal article supplement (PMC5493350; doi:10.1371/journal.pone.0180138), 2017-06-30
Supplement: pone.0180138.s001.pdf [file pone.0180138.s001.pdf]

1  
2  
3

**S1 Table. ICRS macroscopic evaluation of cartilage repair**

| <b>Cartilage repair assessment ICRS</b>                                              | <b>Points</b> |
|--------------------------------------------------------------------------------------|---------------|
| Degree of defect repair                                                              |               |
| In level with surrounding cartilage                                                  | 4             |
| 75% repair of defect depth                                                           | 3             |
| 50% repair of defect depth                                                           | 2             |
| 25% repair of defect depth                                                           | 1             |
| 0% repair of defect depth                                                            | 0             |
| Integration to border zone                                                           |               |
| Complete integration with surrounding cartilage                                      | 4             |
| Demarcating border < 1 mm                                                            | 3             |
| 3/4th of graft integrated, 1/4th with a notable border > 1 mm width                  | 2             |
| 1/2 of graft integrated with surrounding cartilage, 1/2 with a notable border > 1 mm | 1             |
| From no contact to 1/4th of graft integrated with surrounding cartilage              | 0             |
| Macroscopic appearance                                                               |               |
| Intact smooth surface                                                                | 4             |
| Fibrillated surface                                                                  | 3             |
| Small, scattered fissures or cracks                                                  | 2             |
| Several, small or few but large fissures                                             | 1             |
| Total degeneration of grafted area                                                   | 0             |
| Overall repair assessment                                                            |               |
| Grade I: normal                                                                      | 12            |
| Grade II: nearly normal                                                              | 11–8          |
| Grade III: abnormal                                                                  | 7–4           |
| Grade IV: severely abnormal                                                          | 3–1           |

4
