# Supplementary material for: Regeneration of hyaline-like cartilage in situ with SOX9 stimulation of bone marrow-derived mesenchymal stem cells
Source: PubMed Central journal article supplement (PMC5493350; doi:10.1371/journal.pone.0180138), 2017-06-30
Supplement: pone.0180138.s002.pdf [file pone.0180138.s002.pdf]

1

2 **S2 Table. ICRS Visual Histological Assessment Scale**

| <b>Feature</b>                                     | <b>Points</b> |
|----------------------------------------------------|---------------|
| I. Surface                                         |               |
| Smooth/continuous                                  | 3             |
| Discontinuities/irregularities                     | 0             |
| II. Matrix                                         |               |
| Hyaline                                            | 3             |
| Mixture: hyaline/fibrocartilage                    | 2             |
| Fibrocartilage                                     | 1             |
| Fibrous tissue                                     | 0             |
| III. Cell distribution                             |               |
| Columnar                                           | 3             |
| Mixed/columnar-clusters                            | 2             |
| Clusters                                           | 1             |
| Individual cells/disorganized                      | 0             |
| IV. Cell population viability                      |               |
| Predominantly viable                               | 3             |
| Partially viable                                   | 1             |
| <10% viable                                        | 0             |
| V. Subchondral Bone                                |               |
| Normal                                             | 3             |
| Increased remodeling                               | 2             |
| Bone necrosis/granulation tissue                   | 1             |
| Detached/fracture/callus at base                   | 0             |
| VI. Cartilage mineralization (calcified cartilage) |               |
| Normal                                             | 3             |
| Abnormal/inappropriate location                    | 0             |
| 3 Safranin O stain                                 |               |
| 4     Normal                                       | 4             |
| 5     Slight reduction                             | 3             |
| 6     Moderate reduction                           | 2             |
| 7     Severe reduction                             | 1             |
| 8     No staining                                  | 0             |
| 9 Percent safranin O in defect                     |               |
| 10     75–100%                                     | 4             |
| 11     50–75%                                      | 3             |
| 12     25–50%                                      | 2             |
| 13     0–25%                                       | 1             |
| No safranin O staining                             | 0             |

14

15
