# Supplementary material for: Regeneration of hyaline-like cartilage in situ with SOX9 stimulation of bone marrow-derived mesenchymal stem cells
Source: PubMed Central journal article supplement (PMC5493350; doi:10.1371/journal.pone.0180138), 2017-06-30
Supplement: pone.0180138.s004.pdf [file pone.0180138.s004.pdf]

1

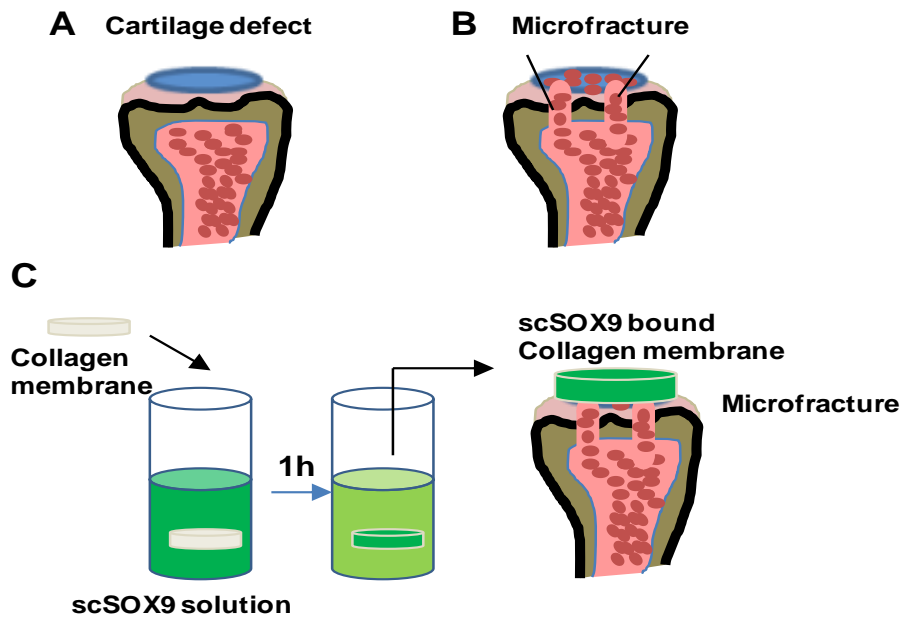

2

3

4

5

6

7

8

9

**S2 Fig. Schematic diagram** showing a model of cartilage defect (A), microfracture (B) and application of scSOX9 in a collagen membrane (C) for cartilage repair (this diagram was prepared based on Fig. 1 of reference #25 with modifications).
